# Supplementary material
Source: Elsevier journal article supplement (https://www.sciencedirect.com/science/article/pii/S1134793717300568)
Supplement: mmc1 [file S1134793717300568:mmc1.docx]

**Anexo I. Cuestionario Sociodemográfico y Deportivo**

Rellena las siguientes cuestiones con la mayor sinceridad posible. Tu respuesta será confidencial.

*Obligatorio

## Edad *

Nota: Escribir sólo el número, no es necesario poner el sufijo "años".

## Altura *

Nota: Exprésalo en centímetros. Ej: 181

## Peso *

Nota: Expresar solo el número en Kgs, no es necesario poner la unidad de medida. Ej: 85

## Sexo *

*Marca solo un óvalo.*

Hombre Mujer

**5. ¿Qué deporte practicas principalmente? *** *Marca solo un óvalo.*

Ajedrez Atletismo Badminton

Running Balonmano

Ciclismo (Carretera, Ciclocross y mountainbike) Baloncesto

Crossfit Culturismo Esgrima Esquí

Fútbol

Musculación (Fitness) Deporte Salud

Hapkido Judo Karate Natación Ninjutsu Padel Patinaje Remo Rugby Triathlon Tenis

Tenis de mesa

Tiro con Arco Vela

Otro:

**6. ¿Perteneces a algún club? *** *Marca solo un óvalo.*

Sí No

1. **¿Estás federado? *** *Marca solo un óvalo.*

Sí No

1. **¿Eres profesional de tu deporte? *** *Marca solo un óvalo.*

Sí No

1. **¿Eres aficionado o amateur? *** *Marca solo un óvalo.*

Sí No

1. **¿Consideras que en el deporte has llegado hasta donde querías llegar? *** *Marca solo un óvalo.*

Sí No

# Responde en caso de que hayas contestado NO, a la pregunta anterior.

**¿Qué es lo que NO te ha hecho llegar ahí?**

Responde a las siguientes preguntas, sólo en caso de que hayas puesto No en la pregunta:

¿Consideras que en el deporte has llegado hasta donde querías llegar?.

## Lesiones

*Marca solo un óvalo.*

Sí No

1. **Apoyo Familiar** *Marca solo un óvalo.*

Sí No

## Tiempo

*Marca solo un óvalo.*

Sí No

## Estudios

*Marca solo un óvalo.*

Sí No

## Trabajo

*Marca solo un óvalo.*

Sí No

## Físico

*Marca solo un óvalo.*

Sí No

## 
